# Supplementary material
Source: Springer Nature journal article supplement (https://www.springermedizin.de/resource/supplementary/12911_2008_253_MOESM7_ESM.pdf/9527470)
Supplement: MOESM7 [file 9527470]

### Pure Technical Features

Integration with charting order entry system to support workflow efficiency

The system is fast

Data standards support integration with EHRs, legacy systems

CDSS could be readily transported to another site (generalizability)

The system is always up and running

### Technical/User Interactions

Computers are readily available in convenient locations for users

The CDSS supports the user(s) task at hand

Automatic provision of decision support as part of clinician workflow

No need for additional clinician data entry

Reasons are requested when recommendations not followed

Provision of decision support at time and location of decision making

Recommendations executed by noting agreement

Saves clinicians time or requires minimal time to use

Clear and intuitive user interface with prominent display of advice

Provision of decision support goes to patients as well as providers

Clear incentive for user(s) to use system

### Logic of Decision Support

Provision of a recommendation, not just an assessment

User(s) engaged in recommendation rationale

Justification of decision support via provision of research evidence

Assessment and recommendations are accurate and reliable

### Developmental/Administrative Environment

Local user involvement in development process

User(s) is/are early adapters

Active involvement of local opinion leaders

Organization fosters and acts on improvement suggestions

CDSS launch supported by educational campaign

Interested users have the freedom to embrace the CDSS without

waiting for multiple colleagues or staff to approve

CDSS developers are also evaluators

Setting has learners involved
